# Supplementary material for: A human Dravet syndrome model from patient induced pluripotent stem cells
Source: PubMed Central journal article supplement (PMC3655893; doi:10.1186/1756-6606-6-19), 2013-05-02
Supplement: 1756-6606-6-19-S2.pdf [file 1756-6606-6-19-S2.pdf]

**Real-time PCR efficiency, Na<sub>v</sub> genes**

| <b>Gene</b>  | <b>Slope of standard curve</b> | <b>PCR efficiency</b> |
|--------------|--------------------------------|-----------------------|
| <i>SCN1A</i> | -3.334                         | 1.99                  |
| <i>SCN2A</i> | -3.357                         | 1.99                  |
| <i>SCN3A</i> | -3.255                         | 2.03                  |
| <i>SCN8A</i> | -3.32                          | 2.00                  |

PCR efficiency ( $E$ ) was calculated from  $E = 10^{(-1/k)}$ , where  $k$  is the slope of the standard curve. The respective primer sequences are compiled in Table 1.

**Table 2: Primer details for real-time PCR**

| <b>Target</b>                | <b>Forward</b>            | <b>Reverse</b>          |
|------------------------------|---------------------------|-------------------------|
| <i>β-actin</i>               | GATCAAGATCATTGCTCCTCCT    | GGGTGTAACGCAACTAAGTCA   |
| <i>Sox2 (tg<sup>*</sup>)</i> | ACGGCCATTAACGGCACACTG     |                         |
| <i>Klf4 (tg)</i>             | CACCTCGCCTTACACATGAAGAG   | CCCTTTTCTGGAGACTAAATAAA |
| <i>Oct3/4 (tg)</i>           | TCTGGGCTCTCCCATGCATTCAAAC |                         |
| <i>c-Myc (tg)</i>            | CTTGAACAGCTACGGAACTCTTG   |                         |
| <i>SCN1A</i>                 | AACAGAATCAGGCCACCTTG      | CACTGGGCTCTCTGGAATG     |
| <i>SCN2A</i>                 | GCTACACGAGCTTTGACACC      | CCCAAGAAAATGACCAGCAC    |
| <i>SCN3A</i>                 | ATGGTGTGGTTTCCTTGGTG      | TGACTTCCGTTTCTGTGGTG    |
| <i>SCN8A</i>                 | GGACCCATGGAAGTGGTTAG      | ACCCTGAAAGTGCCTAGAGC    |
| <i>Nkx2.1</i>                | AGCACACGACTCCGTTCTCA      | CCCTCCATGCCCACTTTCTT    |

All sequences are displayed in 5'-to-3' direction. \*tg, transgene
